# Supplementary material for: Secular trends and correlates of physical activity: The Tromsø Study 1979-2008
Source: Springer Nature journal article supplement (doi:10.1186/s12889-016-3886-z), 2016-12-01

### a. Mostly sedentary

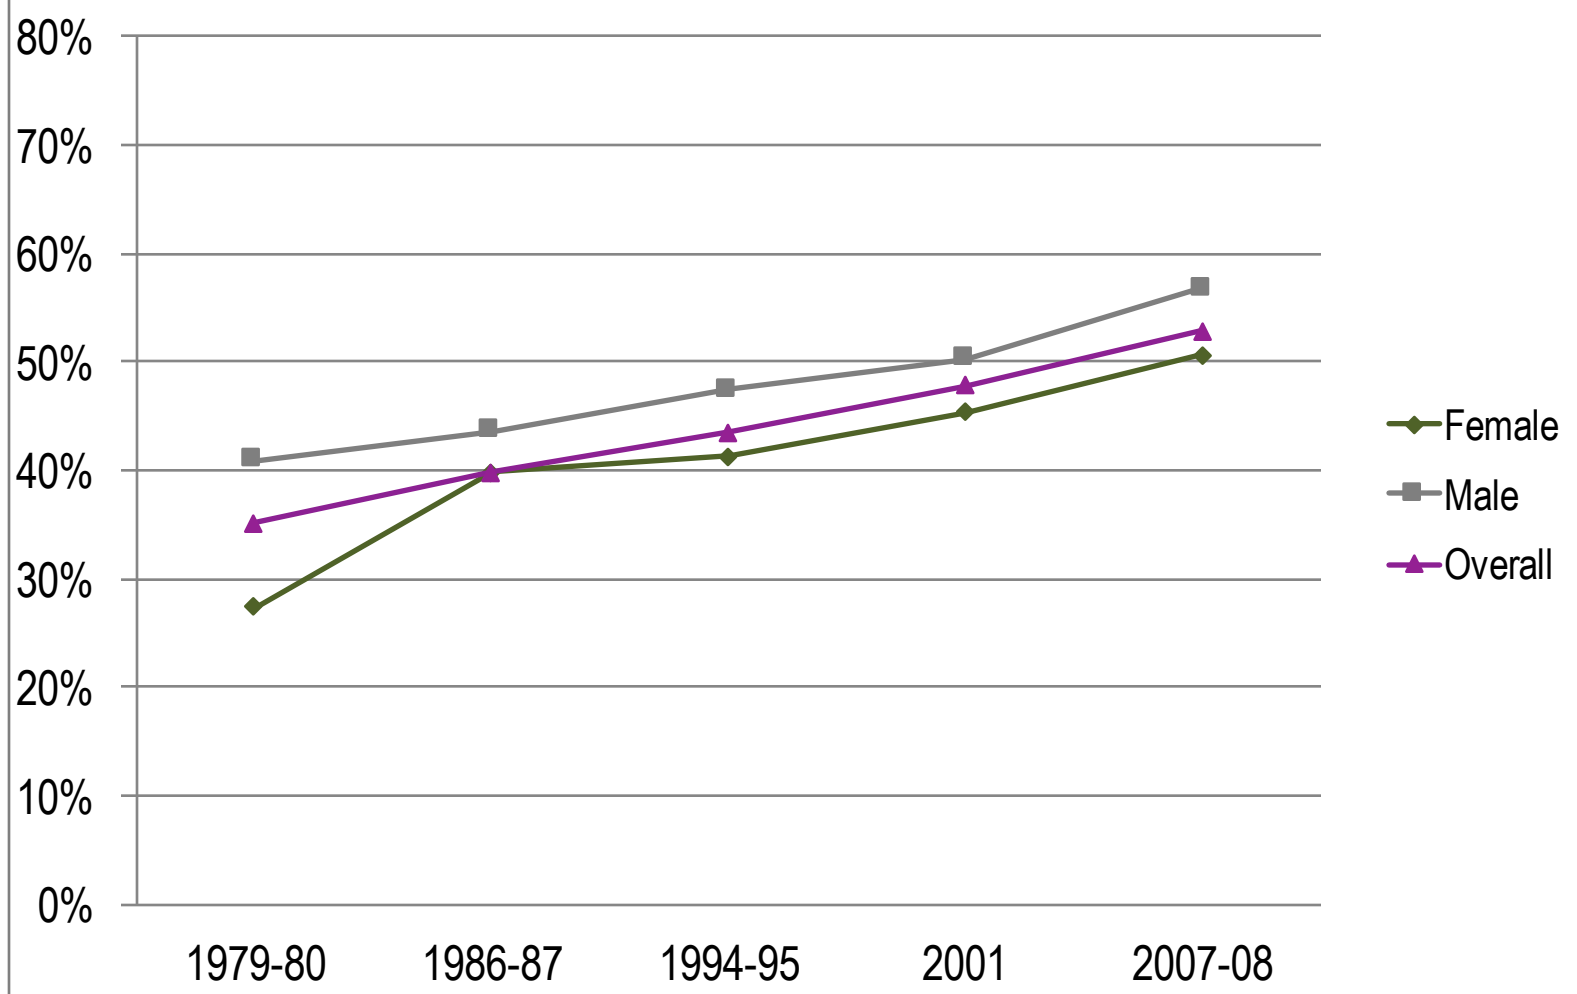

### b. Walking

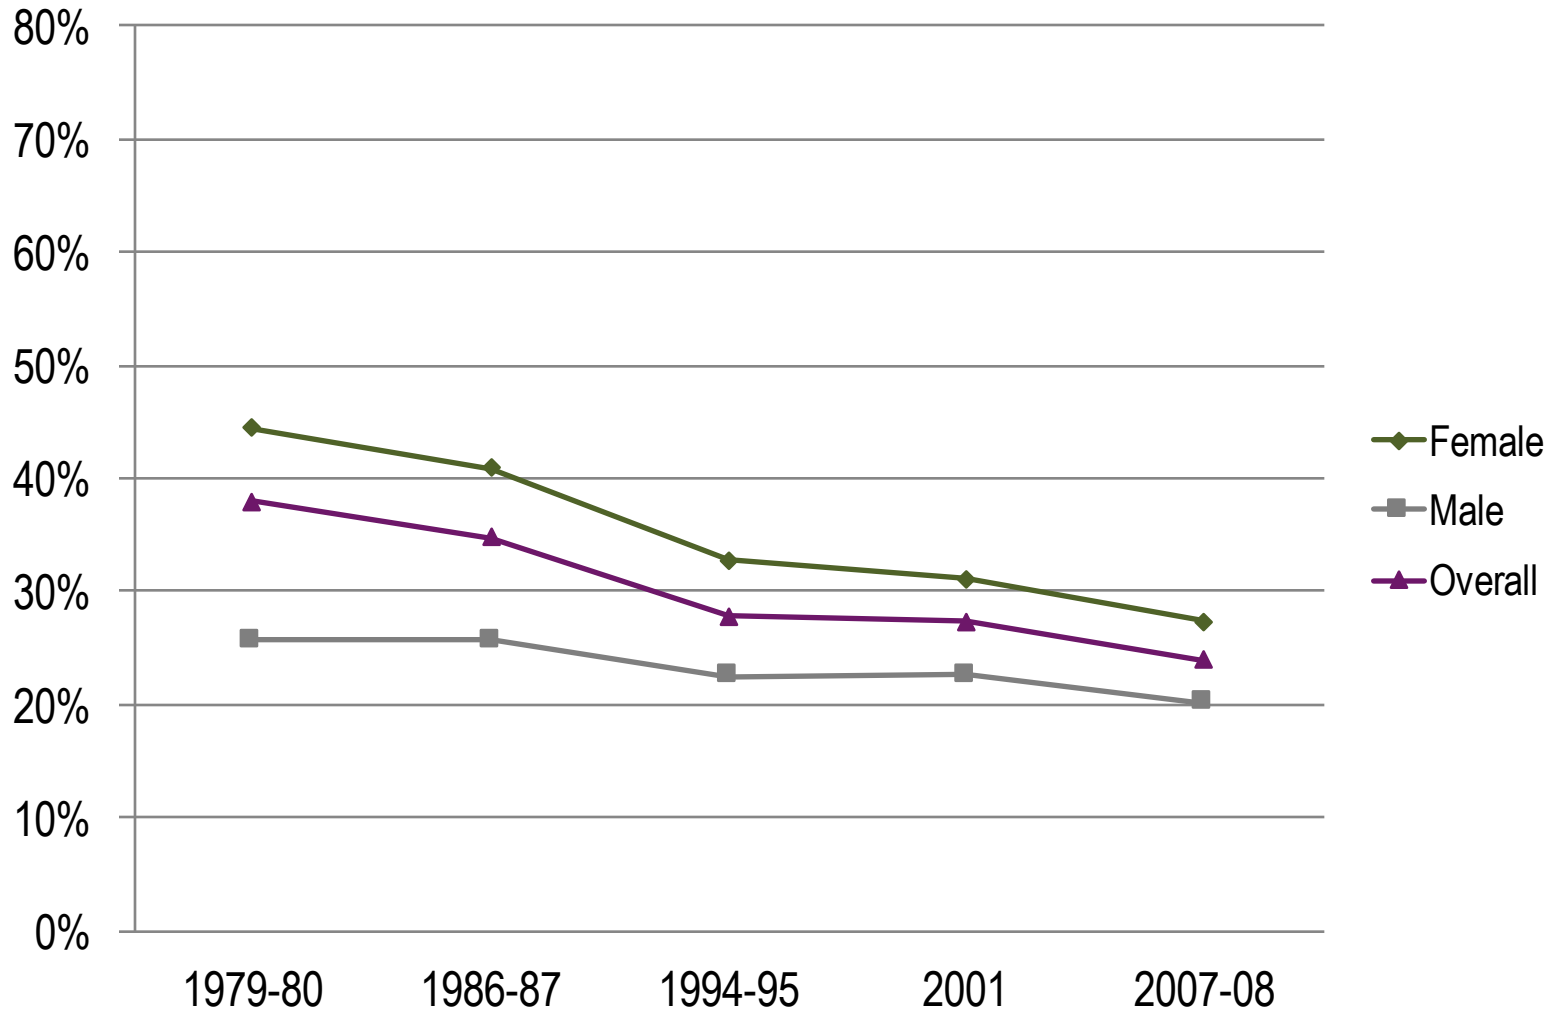

### c. Walking and lifting

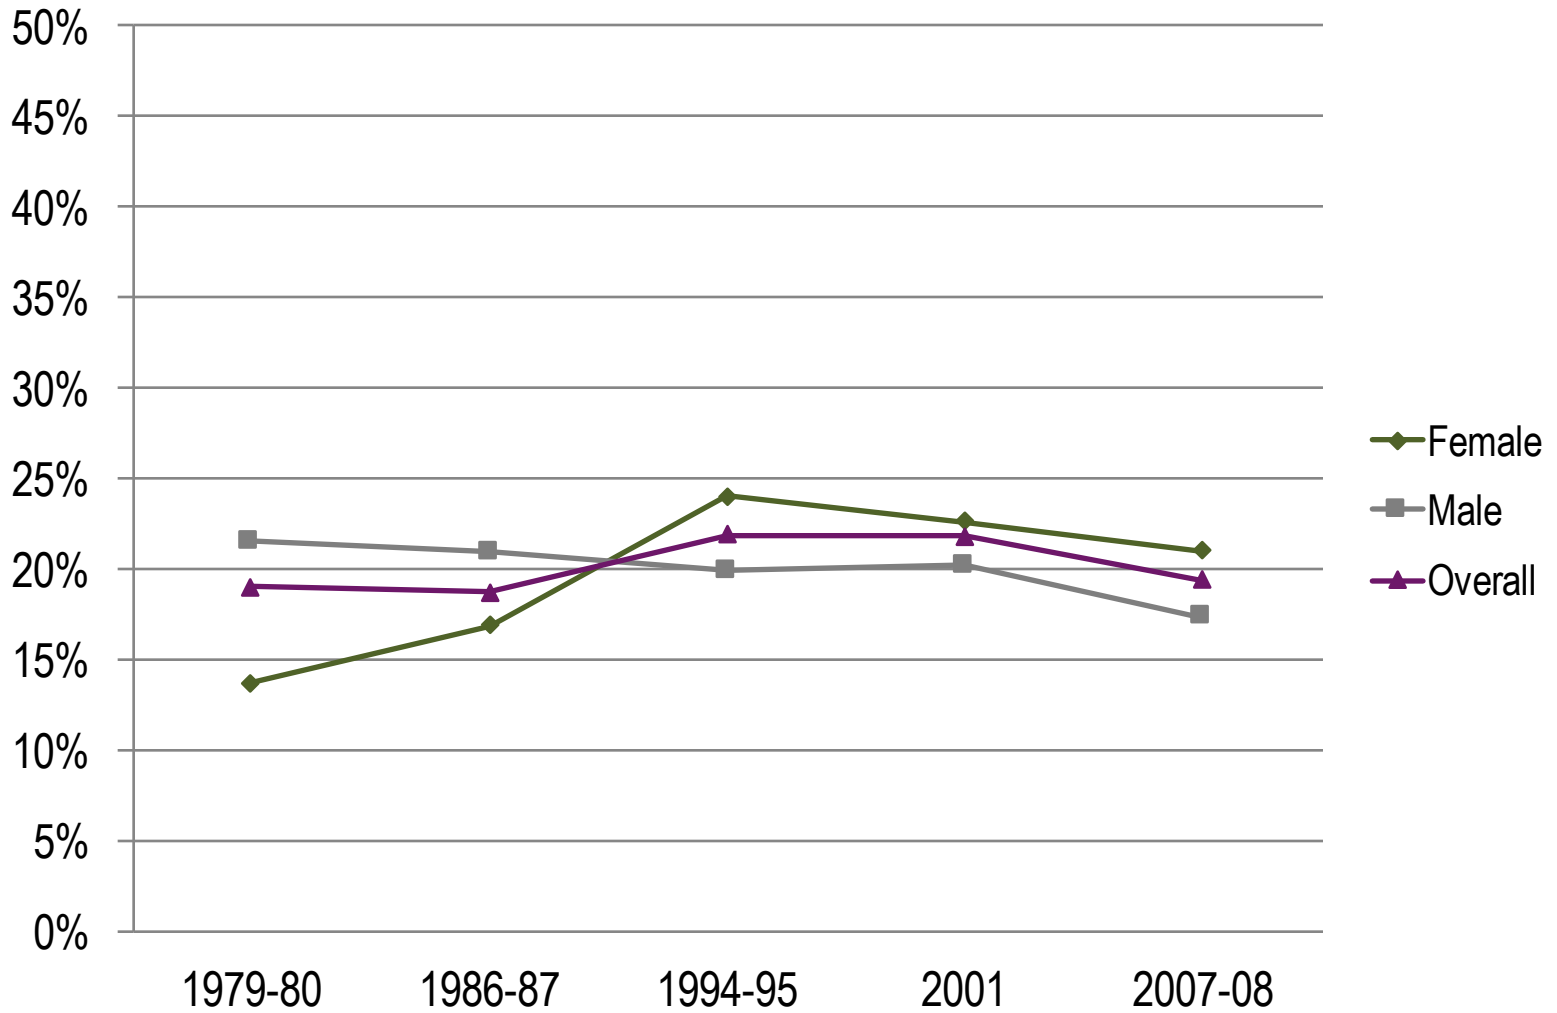

d. Heavy manual labor

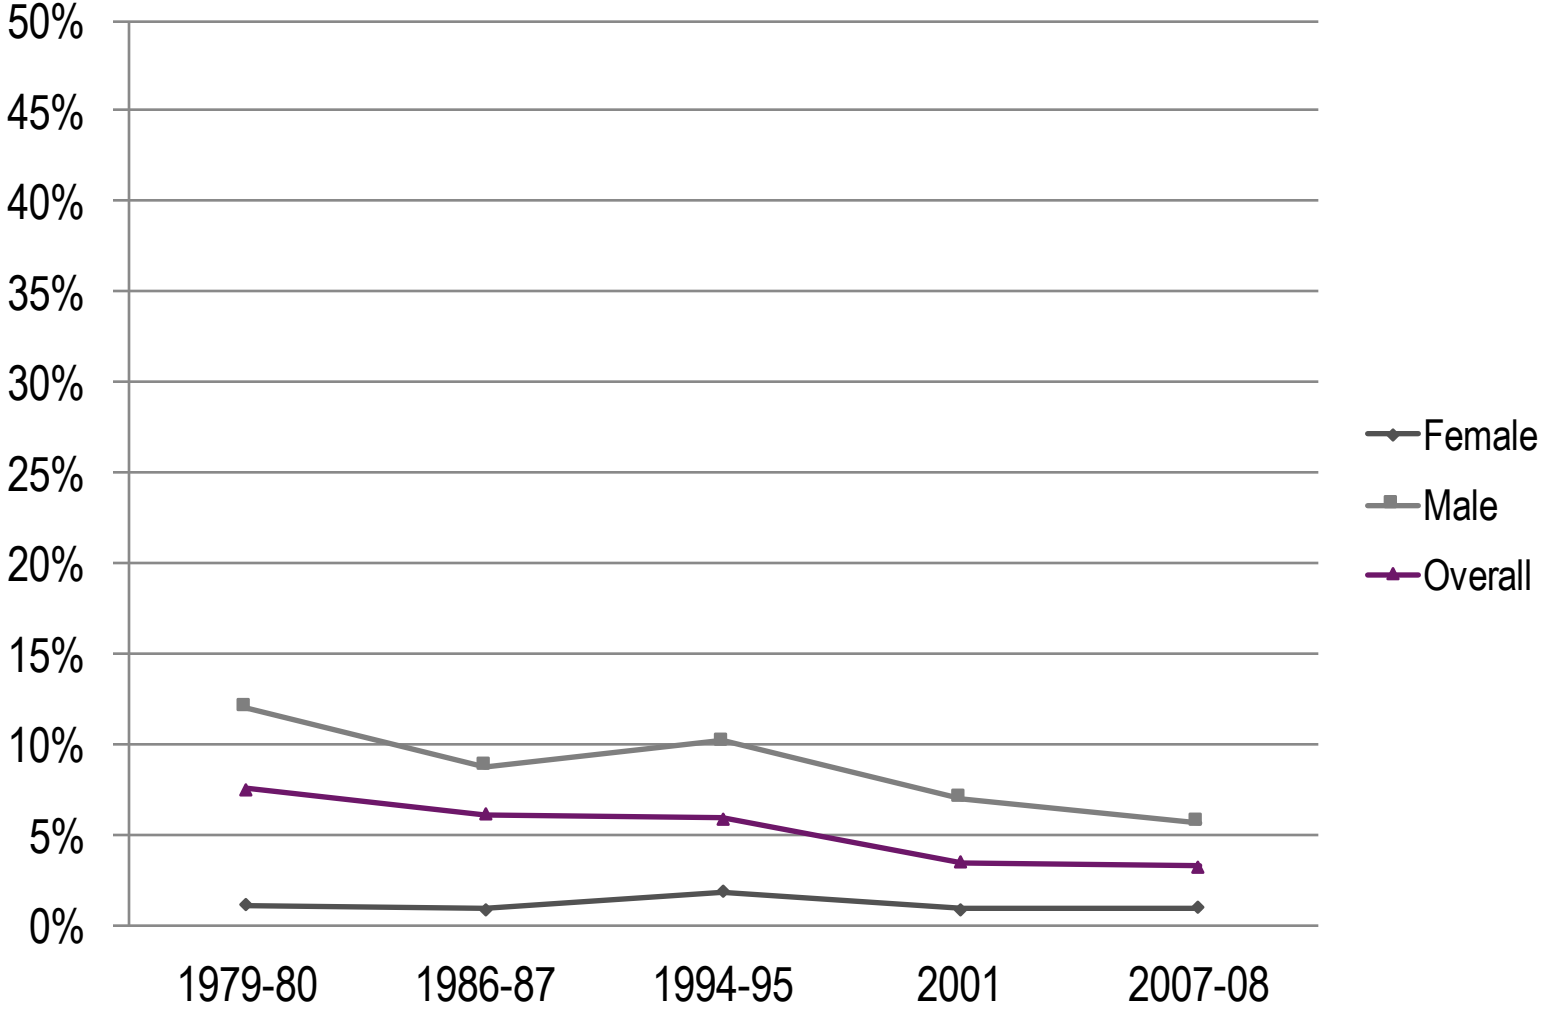

Supplement: MOESM3 [file 11108858]
